# Supplementary material for: The small and large ribosomal subunits depend on each other for stability and accumulation
Source: Life Sci Alliance. 2019 Mar 5;2(2):e201800150. doi: 10.26508/lsa.201800150 (PMC6402506; doi:10.26508/lsa.201800150)
Supplement: Supplementary file 1 [file LSA-2018-00150_SdataF3.xlsx]

## Sheet: All
Supplementary Table 1. Quantification of Western blots																															Normalized to t=0
				Raw Western values (3 independent experiments)				Protein nomalized to t=0								uS4/uL4					uL5/uL4					uL18/uL4					uS4/uL4					uL5/uL4					uL18/uL4
Strain	Gene repressed	Hours after shift	Anti-serum	Exp 1	Exp 2	Exp 3	Average	Exp 1	Exp 2	Exp 3	Average	St error of the mean	Strain	Gene repressed	Hours after shift	Exp 1	Exp 2	Exp 3	Avg	Std-error	Exp 1	Exp 2	Exp 3	Avg	Std-error	Exp 1	Exp 2	Exp 3	Avg	Std-error	Exp 1	Exp 2	Exp 3	Avg	Std-error	Exp 1	Exp 2	Exp 3	Avg	Std-error	Exp 1	Exp 2	Exp 3	Avg	Std-error
BY4741	None	0	anti uS4/S9	6936.15	7919.17	6043.44	6966.25	1	1	1	1	0	BY4741	None	0	1.25159	1.15214	1.02942	1.14438	0.0643296	0.200072	0.167859	0.184846	0.184259	0.00931469	0.461593	0.457683	0.460695	0.45999	0.0011837	1	1	1	1	0	1	1	1	1	0	1	1	1	1	0
		1		6575.68	7012.78	7018.49	6868.98	0.948031	0.885545	1.16134	0.998306	0.0835882			1	1.20996	1.13478	1.1408	1.16185	0.0241479	0.216402	0.218368	0.224568	0.219779	0.00246357	0.556991	0.505556	0.490882	0.51781	0.0200671	0.966739	0.984936	1.1082	1.01996	0.0288015	1.08162	1.3009	1.21489	1.19914	0.0747871	1.20667	1.1046	1.06553	1.1256	0.0478087
		2		6178.85	6198.61	6146.85	6174.77	0.890819	0.782735	1.01711	0.896889	0.067807			2	1.01878	0.968056	0.994966	0.993933	0.0146689	0.206917	0.196723	0.218205	0.207282	0.00621143	0.478102	0.420991	0.473628	0.457574	0.0183587	0.813986	0.840225	0.966534	0.873582	0.0618002	1.03421	1.17195	1.18047	1.12888	0.0549526	1.03577	0.91983	1.02807	0.994557	0.054642
		4		5654.68	6225.1	6742.61	6207.46	0.815248	0.78608	1.11569	0.905673	0.105471			4	1.01895	1.14477	1.16853	1.11075	0.0464656	0.225615	0.227913	0.235452	0.22966	0.00297439	0.561827	0.608701	0.505354	0.558627	0.0299118	0.81412	0.993605	1.13514	0.980954	0.0741003	1.12767	1.35776	1.27377	1.25307	0.0651804	1.21715	1.32996	1.09694	1.21468	0.08495
		8		6598.56	7144.56	5522.85	6421.99	0.951329	0.902186	0.913859	0.922458	0.0148413			8	1.01738	1.10788	1.03598	1.05375	0.0276248	0.208348	0.208437	0.210101	0.208962	0.000570953	0.422229	0.421118	0.422281	0.421876	0.000379823	0.812872	0.961582	1.00637	0.926942	0.0714901	1.04137	1.24174	1.13663	1.13991	0.0665388	0.914722	0.920108	0.916619	0.917149	0.103268
		0	anti uL4/L4	5541.86	6873.45	5870.74	6095.35	1	1	1	1	0				uS4/uL4										uL18/uL4					uS4/uL4										uL18/uL4
		1		5434.62	6179.84	6152.26	5922.24	0.980649	0.899089	1.04795	0.975897	0.0430897	Strain	Gene repressed	Hours after shift	Exp 1	Exp 2	Exp 3	Avg	Std-error						Exp 1	Exp 2	Exp 3	Avg	Std-error	Exp 1	Exp 2	Exp 3	Avg	Std-error						Exp 1	Exp 2	Exp 3	Avg	Std-error
		2		6064.96	6403.15	6177.95	6215.36	1.09439	0.931578	1.05233	1.0261	0.0488533
		4		5549.54	5437.85	5770.18	5585.86	1.00139	0.791139	0.98287	0.925132	0.0672888	JWY8402	uL4/L4	0	1.44574	1.44863	1.22938	1.37458	0.0726938						0.858183	0.902216	0.815637	0.858679	0.0250238	1	1	1	1	0						1	1	1	1	0
		8		6485.81	6448.88	5331.05	6088.58	1.17033	0.938231	0.908072	1.00554	0.08295			1	1.24108	1.37082	1.33812	1.31668	0.0390023						0.919046	1.14146	1.17822	1.07958	0.0810598	0.858445	0.946284	1.08846	0.964395	0.0438527						1.07092	1.26517	1.44454	1.26021	0.106896
															2	1.47855	1.37778	1.28198	1.37943	0.0568161						1.51357	1.36563	1.4934	1.45753	0.0463724	1.02269	0.951086	1.04279	1.00552	0.0476997						1.76369	1.51364	1.83096	1.70276	0.167237
		0	anti uL5/L11	1108.77	1153.77	1085.18	1115.91	1	1	1	1	0			4	1.52493	1.53962	1.21059	1.42505	0.10744						2.04429	2.35746	2.51353	2.30509	0.13813	1.05478	1.06281	0.984717	1.0341	0.0252488						2.38211	2.61297	3.08167	2.69225	0.344351
		1		1176.06	1349.48	1381.6	1302.38	1.06069	1.16962	1.27315	1.16782	0.06141			8	1.24391	1.57169	1.39532	1.40364	0.0948243						3.8682	3.39058	5.05922	4.106	0.496741	0.860399	1.08494	1.13498	1.02678	0.0557043						4.50743	3.75806	6.20278	4.82276	0.824629
		2		1254.94	1259.65	1348.06	1287.55	1.13183	1.09177	1.24224	1.15528	0.0450464
		4		1252.06	1239.36	1358.6	1283.34	1.12924	1.07418	1.25195	1.15179	0.0526053				uS4/uL4					uL5/uL4					uL18/uL4					uS4/uL4					uL5/uL4					uL18/uL4
		8		1351.31	1344.18	1120.06	1271.85	1.21874	1.16504	1.03214	1.13864	0.0555265	Strain	Gene repressed	Hours after shift	Exp 1	Exp 2	Exp 3	Avg	Std-error	Exp 1	Exp 2	Exp 3	Avg	Std-error	Exp 1	Exp 2	Exp 3	Avg	Std-error	Exp 1	Exp 2	Exp 3	Avg	Std-error	Exp 1	Exp 2	Exp 3	Avg	Std-error	Exp 1	Exp 2	Exp 3	Avg	Std-error
		0	anti uL18/L5	2558.08	3145.86	2704.62	2802.85	1	1	1	1	0	Y1090	uL18/L5	0	1.45352	1.17585	1.47695	1.36877	0.0968115	0.134313	0.183623	0.20524	0.174392	0.0210136	0.852806	0.896336	0.92171	0.890284	0.0201436	1	1	1	1	0	1	1	1	1	0	1	1	1	1	0
		1		3027.03	3124.26	3020.03	3057.11	1.18332	0.993132	1.11662	1.09769	0.0557787			1	1.39002	1.18425	1.332	1.30209	0.0613272	0.160811	0.142861	0.17035	0.158007	0.00806784	0.808644	0.724967	0.95435	0.82932	0.0670989	0.956311	1.00714	0.901863	0.955104	0.0238987	1.19729	0.778009	0.830001	0.935099	0.0859395	0.948216	0.808811	1.03541	0.930813	0.047123
		2		2899.67	2695.67	2926.05	2840.46	1.13353	0.856894	1.08187	1.0241	0.0850232			2	1.69472	1.65024	1.72494	1.68996	0.0217208	0.189384	0.207817	0.157256	0.184819	0.0147906	0.91515	0.83169	0.808252	0.851697	0.0324783	1.16594	1.40344	1.16791	1.24576	0.106321	1.41002	1.13176	0.766205	1.10266	0.153861	1.0731	0.927877	0.876905	0.959296	0.0566117
		4		3117.88	3310.02	2915.98	3114.63	1.21884	1.05218	1.07815	1.11639	0.0518298			4	1.46885	1.39699	1.47677	1.44754	0.025407	0.13476	0.170179	0.184221	0.163054	0.0147335	0.588972	0.537087	0.661773	0.595944	0.0362048	1.01055	1.18807	0.999883	1.06617	0.0848618	1.00333	0.926784	0.897589	0.942568	0.129853	0.690628	0.599203	0.717984	0.669272	0.101534
		8		2738.5	2715.74	2251.2	2568.48	1.07053	0.863274	0.832356	0.922052	0.0748606			8	1.44835	1.13479	1.30554	1.29623	0.0907428	0.119201	0.0749625	0.0992055	0.0977897	0.0128054	0.549828	0.511675	0.66466	0.575387	0.0460295	0.996443	0.965082	0.883947	0.94849	0.0576534	0.887489	0.408241	0.483363	0.593031	0.14654	0.644728	0.570851	0.721116	0.645565	0.0363982
				Raw Western values (3 independent experiments)				Protein nomalized to t=0
Strain	Gene repressed	Hours after shift	Anti-serum	Exp 1	Exp 2	Exp 3	Average	Exp 1	Exp 2	Exp 3	Average	St error of the mean
																uS4/uL4					uL5/uL4					uL18/uL4					uS4/uL4					uL5/uL4					uL18/uL4
JWY8402	uL4/L4	0	anti uS4/S9	10705.5	10341.6	9962.51	10336.6	1	1	1	1	0	Strain	Gene repressed	Hours after shift	Exp 1	Exp 2	Exp 3	Avg	Std-error	Exp 1	Exp 2	Exp 3	Avg	Std-error	Exp 1	Exp 2	Exp 3	Avg	Std-error	Exp 1	Exp 2	Exp 3	Avg	Std-error	Exp 1	Exp 2	Exp 3	Avg	Std-error	Exp 1	Exp 2	Exp 3	Avg	Std-error
		1		8646.85	8164.44	7692.15	8167.81	0.8077	0.789473	0.772109	0.789761	0.0102873
		2		5886.32	5564.07	4881.83	5444.07	0.549839	0.538027	0.49002	0.525962	0.0183132	Y1101	eL40/L40	0	1.32217	1.40724	1.3359	1.3551	0.0264011	0.157322	0.179452	0.18115	0.172641	0.00768436	0.690694	0.583473	0.57202	0.615396	0.0378391	1	1	1	1	0	1	1	1	1	0	1	1	1	1	0
		4		4123.35	3685.98	2584.2	3464.51	0.38516	0.356422	0.259393	0.333658	0.0380933			1	1.19433	1.34229	1.46098	1.33253	0.0772201	0.135994	0.136438	0.164489	0.14564	0.00943657	0.633359	0.607659	0.736114	0.659044	0.0392892	0.903314	0.95384	1.09363	0.983593	0.0363696	0.864429	0.760305	0.908029	0.844254	0.0565135	0.916989	1.04145	1.28687	1.08177	0.0734272
		8		1307.43	1886.96	1261.7	1485.36	0.122126	0.182463	0.126645	0.143745	0.019426			2	1.64395	1.20792	1.06136	1.30441	0.175169	0.183542	0.123179	0.101296	0.136005	0.0246224	0.841534	0.603681	0.55189	0.665702	0.0892843	1.24337	0.858357	0.794487	0.965406	0.095872	1.16666	0.68642	0.559181	0.804087	0.120893	1.21839	1.03463	0.964808	1.07261	0.0837792
															4	1.02358	1.43454	1.26211	1.24008	0.119285	0.100917	0.16353	0.122373	0.12894	0.0183923	0.580824	0.776148	0.686829	0.681267	0.0565208	0.774172	1.0194	0.944763	0.912778	0.101224	0.641467	0.911274	0.675535	0.742759	0.130155	0.840927	1.33022	1.20071	1.12395	0.105455
		0	anti uL4/L4	7404.9	7138.88	8103.71	7549.17	1	1	1	1	0			8	0.996464	0.901766	1.00248	0.966904	0.0326541	0.115985	0.13093	0.148743	0.131886	0.00947966	0.614008	0.469389	0.647843	0.57708	0.054789	0.75366	0.640802	0.750416	0.714959	0.0810575	0.737244	0.729613	0.821101	0.762653	0.0571101	0.888972	0.804475	1.13255	0.942	0.125496
		1		6967.18	5955.88	5748.47	6223.84	0.940887	0.834288	0.709362	0.828179	0.0669844
		2		3981.15	4038.45	3808.03	3942.54	0.537638	0.565697	0.469912	0.524416	0.0284638				uS4/uL4										uL18/uL4					uS4/uL4										uL18/uL4
		4		2703.96	2394.08	2134.67	2410.9	0.365158	0.335358	0.263419	0.321312	0.0302336	Strain	Gene repressed	Hours after shift	Exp 1	Exp 2	Exp 3	Avg	Std-error						Exp 1	Exp 2	Exp 3	Avg	Std-error	Exp 1	Exp 2	Exp 3	Avg	Std-error						Exp 1	Exp 2	Exp 3	Avg	Std-error
		8		1051.06	1200.6	904.234	1051.96	0.141941	0.168177	0.111583	0.140567	0.0163713
													Y259	uS4/S9	0	2.40377	2.79983	2.88172	2.69511	0.147749						1.01719	1.26913	1.17111	1.15248	0.0734099	1	1	1	1	0						1	1	1	1	0
		0	anti uL5/L11	nd	nd	nd									1	2.34693	2.24265	2.0047	2.19809	0.101395						1.34329	1.15221	1.15521	1.2169	0.0632721	0.976353	0.800995	0.695659	0.824336	0.024						1.32058	0.907877	0.986423	1.07163	0.024
		1		nd	nd	nd									2	1.23229	1.41828	1.07527	1.24195	0.0992554						1.13673	1.30953	1.08316	1.17647	0.0683847	0.512649	0.506561	0.373134	0.464115	0.106						1.11752	1.03183	0.924894	1.02475	0.106
		2		nd	nd	nd									4	0.625979	0.775891	0.552115	0.651328	0.0659084						1.29952	1.34444	1.21287	1.28561	0.0386579	0.260415	0.277121	0.191592	0.243043	0.085						1.27756	1.05934	1.03566	1.12419	0.085
		4		nd	nd	nd									8	0.304139	0.64192	0.407035	0.451031	0.100078						1.19998	1.97504	1.25765	1.47756	0.249592	0.126526	0.229271	0.141247	0.165681	0.058						1.1797	1.55621	1.07389	1.26994	0.058
		8		nd	nd	nd
																uS4/uL4					uL5/uL4					uL18/uL4					uS4/uL4					uL5/uL4					uL18/uL4
		0	anti uL18/L5	6354.76	6440.81	6609.69	6468.42	1	1	1	1	0	Strain	Gene repressed	Hours after shift	Exp 1	Exp 2	Exp 3	Avg	Std-error	Exp 1	Exp 2	Exp 3	Avg	Std-error	Exp 1	Exp 2	Exp 3	Avg	Std-error	Exp 1	Exp 2	Exp 3	Avg	Std-error	Exp 1	Exp 2	Exp 3	Avg	Std-error	Exp 1	Exp 2	Exp 3	Avg	Std-error
		1		6403.15	6798.4	6772.98	6658.18	1.00762	1.05552	1.02471	1.02928	0.0140331
		2		6025.74	5515.03	5686.91	5742.56	0.948224	0.856264	0.86039	0.888293	0.0300251	Y399	uS11/S14	0	1.32224	1.19201	1.49689	1.33705	0.0884277	0.10393	0.0858712	0.0952455	0.0950155	0.00522054	0.682744	0.778223	0.890986	0.783984	0.0602544	1	1	1	1	0	1	1	1	1	0	1	1	1	1	0
		4		5527.67	5643.96	5365.55	5512.39	0.869847	0.876281	0.81177	0.852633	0.0205399			1	1.06228	0.78577	0.571955	0.806669	0.142099	0.100387	0.0980643	0.0873142	0.0952551	0.00403145	0.719924	0.832155	0.849239	0.80044	0.0406066	0.803396	0.659199	0.382095	0.614897	0.144718	0.96591	1.14199	0.916727	1.00821	0.0433263	1.05446	1.0693	0.953146	1.02563	0.0244648
		8		4065.72	4070.72	4574.72	4237.05	0.639791	0.63202	0.692123	0.654645	0.0188954			2	0.8727	0.770786	0.933531	0.859006	0.047533	0.112874	0.11737	0.125589	0.118611	0.00372728	0.845782	0.879897	1.05797	0.927884	0.0658636	0.660016	0.646628	0.623647	0.64343	0.0789891	1.08606	1.36681	1.31859	1.25715	0.105226	1.2388	1.13065	1.18742	1.18562	0.0590133
															4	0.623649	0.535956	0.445094	0.5349	0.0516082	0.137021	0.113895	0.105704	0.118873	0.00938805	1.07774	1.0686	1.28732	1.14456	0.071517	0.471661	0.449625	0.297345	0.40621	0.0829084	1.3184	1.32635	1.1098	1.25152	0.0708411	1.57855	1.37313	1.44483	1.4655	0.0983504
															8	0.327594	0.258975	0.289244	0.291938	0.0198777	0.146824	0.100802	0.108163	0.118596	0.0142896	1.47477	1.25502	1.24463	1.32481	0.0751323	0.247757	0.21726	0.19323	0.219415	0.0692109	1.41272	1.17388	1.13562	1.24074	0.0709116	2.16007	1.61267	1.39691	1.72322	0.169489
				Raw Western values (3 independent experiments)				Protein nomalized to t=0
Strain	Gene repressed	Hours after shift	Anti-serum	Exp 1	Exp 2	Exp 3	Average	Exp 1	Exp 2	Exp 3	Average	St error of the mean
																uS4/uL4					uL5/uL4					uL18/uL4					uS4/uL4					uL5/uL4					uL18/uL4
Y1090	uL18/L5	0	anti uS4/S9	9193.49	7543.07	9036.75	8591.11	1	1	1	1	0	Strain	Gene repressed	Hours after shift	Exp 1	Exp 2	Exp 3	Avg	Std-error	Exp 1	Exp 2	Exp 3	Avg	Std-error	Exp 1	Exp 2	Exp 3	Avg	Std-error	Exp 1	Exp 2	Exp 3	Avg	Std-error	Exp 1	Exp 2	Exp 3	Avg	Std-error	Exp 1	Exp 2	Exp 3	Avg	Std-error
		1		8818.68	7367.9	6953.12	7713.24	0.959231	0.976777	0.769427	0.901812	0.0664644
		2		8117.37	7547.95	8839.02	8168.12	0.882947	1.00065	0.97812	0.953905	0.0361124	Y1198	uS10/S20	0	1.45217	1.51544	1.28674	1.41812	0.0682626	0.177164	0.138336	0.152947	0.156149	0.0113357	0.343463	0.385315	0.431001	0.386593	0.0253081	1	1	1	1	0	1	1	1	1	0	1	1	1	1	0
		4		7413.07	6552.66	5748.59	6571.44	0.80634	0.868699	0.636134	0.770391	0.0695825			1	0.977092	1.04101	1.33182	1.11664	0.10929	0.161854	0.159473	0.164521	0.16195	0.00145975	0.465159	0.44237	0.441802	0.449777	0.00770196	0.672852	0.686933	1.03504	0.798273	0.0983951	0.913587	1.1528	1.07568	1.04735	0.0470305	1.35432	1.14808	1.02506	1.17582	0.0823528
		8		4925	3879.35	3938.3	4247.55	0.535706	0.514293	0.435809	0.495269	0.0304019			2	1.04979	0.934857	1.04037	1.00834	0.0368853	0.171935	0.169736	0.156144	0.165939	0.00494398	0.404153	0.389073	0.368712	0.387313	0.0102809	0.722917	0.616886	0.80853	0.716111	0.0866959	0.970489	1.22699	1.02091	1.07279	0.0671906	1.1767	1.00975	0.855478	1.01398	0.0987484
															4	0.733227	0.726661	0.703388	0.721092	0.00906343	0.179909	0.151265	0.148322	0.159832	0.0100864	0.377595	0.400676	0.440072	0.406114	0.018261	0.50492	0.479504	0.546645	0.510356	0.0749372	1.0155	1.09346	0.969763	1.02624	0.0565733	1.09938	1.03987	1.02105	1.05343	0.0618045
		0	anti uL4/L4	6324.98	6414.98	6118.54	6286.17	1	1	1	1	0			8	0.628195	0.649055	0.726864	0.668038	0.0300586	0.162414	0.178845	0.212848	0.184703	0.0148683	0.494342	0.435816	0.466357	0.465505	0.0169202	0.432592	0.428294	0.564889	0.475258	0.0328693	0.916747	1.29283	1.39165	1.20041	0.109211	1.43929	1.13107	1.08203	1.21746	0.0889626
		1		6344.3	6221.59	5220.05	5928.65	1.00305	0.969853	0.853154	0.94202	0.0455089
		2		4789.81	4573.86	5124.26	4829.31	0.757284	0.712997	0.837497	0.769259	0.0364785
		4		5046.84	4690.55	3892.67	4543.35	0.797922	0.731186	0.636209	0.721772	0.0469748
		8		3400.43	3418.55	3016.6	3278.52	0.537618	0.532901	0.493026	0.521182	0.0141603
		0	anti uL5/L11	849.527	1177.94	1255.77	1094.41	1	1	1	1	0
		1		1020.23	888.82	889.234	932.763	1.20094	0.754554	0.708119	0.887872	0.157295
		2		907.113	950.527	805.82	887.82	1.06779	0.806939	0.641694	0.838806	0.124177
		4		680.113	798.234	717.113	731.82	0.800578	0.677652	0.571054	0.683095	0.0663924
		8		405.335	256.263	299.263	320.287	0.47713	0.217552	0.23831	0.310997	0.083381
		0	anti uL18/L5	5393.98	5749.98	5639.52	5594.49	1	1	1	1	0
		1		5130.28	4510.45	4981.76	4874.16	0.951111	0.784428	0.883366	0.872968	0.0484547
		2		4383.4	3804.03	4141.69	4109.71	0.812646	0.661573	0.734405	0.736208	0.043672
		4		2972.45	2519.23	2576.06	2689.25	0.551067	0.438129	0.456788	0.481995	0.0349952
		8		1869.65	1749.18	2005.01	1874.61	0.346617	0.304207	0.355529	0.335451	0.0158513
				Raw Western values (3 independent experiments)				Protein nomalized to t=0
Strain	Gene repressed	Hours after shift	Anti-serum	Exp 1	Exp 2	Exp 3	Average	Exp 1	Exp 2	Exp 3	Average	St error of the mean
Y1101	eL40/L40	0	anti uS4/S9	6785.18	7986.81	7086.52	7286.17	1	1	1	1	0
		1		6893.98	7142.35	7295.64	7110.66	1.01604	0.894268	1.02951	0.979938	0.0430623
		2		6753.35	6373.93	5625.23	6250.83	0.995309	0.798057	0.793793	0.862386	0.0665516
		4		4108.28	3658.45	3898.98	3888.57	0.605478	0.458061	0.550197	0.537912	0.0430477
		8		2963.33	2899.03	2786.91	2883.09	0.436735	0.362978	0.39327	0.397661	0.0214303
		0	anti uL4/L4	5131.86	5675.5	5304.67	5370.68	1	1	1	1	0
		1		5772.26	5321.03	4993.67	5362.32	1.12479	0.937545	0.941372	1.00124	0.0618595
		2		4108.01	5276.79	5300.03	4894.94	0.800492	0.929749	0.999126	0.909789	0.0582718
		4		4013.62	2550.26	3089.26	3217.71	0.782098	0.449345	0.582365	0.604603	0.0968136
		8		2973.84	3214.84	2780.01	2989.56	0.579486	0.566442	0.524069	0.556666	0.0167475
		0	anti uL5/L11	807.355	1018.48	960.941	928.924	1	1	1	1	0
		1		784.991	725.991	821.406	777.463	0.9723	0.71282	0.854793	0.846638	0.0751051
		2		753.991	649.991	536.87	646.951	0.933903	0.638199	0.558692	0.710265	0.114286
		4		405.042	417.042	378.042	400.042	0.50169	0.409476	0.393408	0.434858	0.0337764
		8		344.92	420.92	413.506	393.115	0.427222	0.413284	0.430314	0.423607	0.00524418
		0	anti uL18/L5	3544.55	3311.5	3034.38	3296.81	1	1	1	1	0
		1		3655.91	3233.38	3675.91	3521.73	1.03142	0.976409	1.21142	1.07308	0.0710532
		2		3457.03	3185.5	2925.03	3189.19	0.97531	0.961951	0.963965	0.967075	0.00416312
		4		2331.2	1979.38	2121.79	2144.12	0.657688	0.597728	0.699251	0.651556	0.0295019
		8		1825.96	1509.01	1801.01	1712	0.515147	0.455689	0.593536	0.521457	0.0399653
				Raw Western values (3 independent experiments)				Protein nomalized to t=0
Strain	Gene repressed	Hours after shift	Anti-serum	Exp 1	Exp 2	Exp 3	Average	Exp 1	Exp 2	Exp 3	Average	St error of the mean
Y259	uS4/S9	0	anti uS4/S9	11055.6	12801.7	12264.4	12040.6	1	1	1	1	0
		1		9876.92	9120	10185.2	9727.39	0.893386	0.712404	0.830475	0.812088	0.0531107
		2		7527.97	6614.85	5586.37	6576.4	0.680919	0.516716	0.455496	0.551044	0.0673794
		4		3167.4	3935.35	3483.93	3528.89	0.286497	0.307408	0.28407	0.292658	0.00741674
		8		1890.79	2299.03	2208.2	2132.68	0.171026	0.179588	0.180051	0.176888	0.00293774
		0	anti uL4/L4	4599.28	4572.33	4255.91	4475.84	1	1	1	1	0
		1		4208.45	4066.62	5080.69	4451.92	0.915024	0.889398	1.1938	0.999406	0.0975916
		2		6108.93	4663.98	5195.33	5322.75	1.32824	1.02005	1.22073	1.18967	0.0904197
		4		5059.91	5072.03	6310.15	5480.7	1.10015	1.10929	1.48268	1.23071	0.126163
		8		6216.86	3581.5	5425.1	5074.49	1.3517	0.783299	1.27472	1.13657	0.178242
		0	anti uL5/L11	nd	nd	nd
		1		nd	nd	nd
		2		nd	nd	nd
		4		nd	nd	nd
		8		nd	nd	nd
		0	anti uL18/L5	4678.35	5802.88	4984.15	5155.13	1	1	1	1	0
		1		5653.15	4685.62	5869.28	5402.68	1.20837	0.807464	1.17759	1.06447	0.128964
		2		6944.23	6107.64	5627.35	6226.4	1.48433	1.05252	1.12905	1.22197	0.133188
		4		6575.47	6819.05	7653.42	7015.98	1.40551	1.17512	1.53555	1.37206	0.105509
		8		7460.12	7073.59	6822.88	7118.87	1.59461	1.21898	1.36891	1.39417	0.109297
				Raw Western values (3 independent experiments)				Protein nomalized to t=0
Strain	Gene repressed	Hours after shift	Anti-serum	Exp 1	Exp 2	Exp 3	Average	Exp 1	Exp 2	Exp 3	Average	St error of the mean
Y399	uS11/S14	0	anti uS4/S9	8172.32	7208.37	9623.85	8334.85	1	1	1	1	0
		1		6442.47	4978.4	3509.91	4976.93	0.788328	0.690641	0.36471	0.61456	0.12822
		2		5206.15	4226.15	5107.45	4846.59	0.637047	0.586284	0.530707	0.58468	0.0307447
		4		3222.96	2901.43	2184.84	2769.74	0.394376	0.402508	0.227024	0.341302	0.0572554
		8		1422.18	1281.36	1473.89	1392.48	0.174025	0.177759	0.15315	0.168311	0.00766609
		0	anti uL4/L4	6180.66	6047.25	6429.23	6219.04	1	1	1	1	0
		1		6064.74	6335.69	6136.69	6179.04	0.981245	1.0477	0.954499	0.994481	0.0277392
		2		5965.57	5482.91	5471.1	5639.86	0.965199	0.906679	0.850974	0.907618	0.0330164
		4		5167.91	5413.55	4908.72	5163.39	0.836142	0.895209	0.763501	0.831617	0.0381332
		8		4341.31	4947.79	5095.67	4794.92	0.702402	0.818189	0.792579	0.771057	0.0351562
		0	anti uL5/L11	642.355	519.284	612.355	591.331	1	1	1	1	0
		1		608.82	621.305	535.82	588.648	0.947794	1.19646	0.875015	1.00642	0.0974304
		2		673.355	643.527	687.113	667.998	1.04826	1.23926	1.12208	1.13653	0.0556738
		4		708.113	616.577	518.87	614.52	1.10237	1.18736	0.847335	1.04569	0.102287
		8		637.406	498.749	551.163	562.439	0.992296	0.960455	0.900071	0.950941	0.0270767
		0	anti uL18/L5	4219.81	4706.1	5728.35	4884.75	1	1	1	1	0
		1		4366.15	5272.28	5211.52	4949.98	1.03468	1.12031	0.909777	1.02159	0.0611985
		2		5045.57	4824.4	5788.28	5219.41	1.19569	1.02514	1.01046	1.07709	0.0595173
		4		5569.69	5784.91	6319.1	5891.24	1.31989	1.22924	1.10313	1.21742	0.0629267
		8		6402.45	6209.57	6342.23	6318.08	1.51724	1.31947	1.10716	1.31462	0.118542
				Raw Western values (3 independent experiments)				Protein nomalized to t=0
Strain	Gene repressed	Hours after shift	Anti-serum	Exp 1	Exp 2	Exp 3	Average	Exp 1	Exp 2	Exp 3	Average	St error of the mean
Y1198	uS10/S20	0	anti uS4/S9	8638.48	9965.02	8762.94	9122.15	1	1	1	1	0
		1		6985.02	7507.36	9363.19	7951.86	0.808594	0.753371	1.0685	0.876821	0.0972703
		2		7470.55	6051.97	6373.99	6632.17	0.864799	0.607322	0.72738	0.733167	0.0744717
		4		4854.22	4529.78	4285.61	4556.54	0.56193	0.454568	0.48906	0.501853	0.0316831
		8		4203.47	4318.47	3905.9	4142.61	0.486598	0.433363	0.445729	0.45523	0.0161042
		0	anti uL4/L4	5948.69	6575.64	6810.2	6444.85	1	1	1	1	0
		1		7148.79	7211.62	7030.38	7130.26	1.20174	1.09672	1.03233	1.11026	0.0494304
		2		7116.2	6473.69	6126.69	6572.19	1.19626	0.984496	0.899634	1.0268	0.088308
		4		6620.35	6233.69	6092.81	6315.62	1.11291	0.947997	0.894659	0.985188	0.065768
		8		6691.35	6653.47	5373.64	6239.48	1.12484	1.01184	0.789057	0.975246	0.0987616
		0	anti uL5/L11	1053.89	909.648	1041.6	1001.71	1	1	1	1	0
		1		1157.06	1150.06	1156.65	1154.59	1.0979	1.26429	1.11046	1.15755	0.0535591
		2		1223.53	1098.82	956.648	1093	1.16096	1.20796	0.918443	1.09579	0.0898114
		4		1191.06	942.941	903.698	1012.57	1.13016	1.0366	0.867607	1.01145	0.0769183
		8		1086.77	1189.94	1143.77	1140.16	1.0312	1.30813	1.09809	1.14581	0.0835274
		0	anti uL18/L5	2043.15	2533.69	2935.2	2504.02	1	1	1	1	0
		1		3325.33	3190.2	3106.03	3207.19	1.62755	1.25911	1.0582	1.31495	0.166908
		2		2876.03	2518.74	2258.98	2551.25	1.40764	0.9941	0.769617	1.05712	0.18708
		4		2499.81	2497.69	2681.28	2559.59	1.22351	0.985791	0.913488	1.04093	0.0937553
		8		3307.81	2899.69	2506.03	2904.51	1.61897	1.14445	0.853785	1.20574	0.22327

## Sheet: Page 1
Source data for Figure 3A-D: Quantification of Western blots
				Raw Western values (3 independent experiments)				Protein nomalized to t=0
Strain	Gene repressed	Hours after shift	Anti-serum	Exp 1	Exp 2	Exp 3	Average	Exp 1	Exp 2	Exp 3	Average	St error of the mean
BY4741	None	0	anti uS4/S9	6936.15	7919.17	6043.44	6966.25	1	1	1	1	0
		1		6575.68	7012.78	7018.49	6868.98	0.948031	0.885545	1.16134	0.998306	0.0835882
		2		6178.85	6198.61	6146.85	6174.77	0.890819	0.782735	1.01711	0.896889	0.067807
		4		5654.68	6225.1	6742.61	6207.46	0.815248	0.78608	1.11569	0.905673	0.105471
		8		6598.56	7144.56	5522.85	6421.99	0.951329	0.902186	0.913859	0.922458	0.0148413
		0	anti uL4/L4	5541.86	6873.45	5870.74	6095.35	1	1	1	1	0
		1		5434.62	6179.84	6152.26	5922.24	0.980649	0.899089	1.04795	0.975897	0.0430897
		2		6064.96	6403.15	6177.95	6215.36	1.09439	0.931578	1.05233	1.0261	0.0488533
		4		5549.54	5437.85	5770.18	5585.86	1.00139	0.791139	0.98287	0.925132	0.0672888
		8		6485.81	6448.88	5331.05	6088.58	1.17033	0.938231	0.908072	1.00554	0.08295
		0	anti uL5/L11	1108.77	1153.77	1085.18	1115.91	1	1	1	1	0
		1		1176.06	1349.48	1381.6	1302.38	1.06069	1.16962	1.27315	1.16782	0.06141
		2		1254.94	1259.65	1348.06	1287.55	1.13183	1.09177	1.24224	1.15528	0.0450464
		4		1252.06	1239.36	1358.6	1283.34	1.12924	1.07418	1.25195	1.15179	0.0526053
		8		1351.31	1344.18	1120.06	1271.85	1.21874	1.16504	1.03214	1.13864	0.0555265
		0	anti uL18/L5	2558.08	3145.86	2704.62	2802.85	1	1	1	1	0
		1		3027.03	3124.26	3020.03	3057.11	1.18332	0.993132	1.11662	1.09769	0.0557787
		2		2899.67	2695.67	2926.05	2840.46	1.13353	0.856894	1.08187	1.0241	0.0850232
		4		3117.88	3310.02	2915.98	3114.63	1.21884	1.05218	1.07815	1.11639	0.0518298
		8		2738.5	2715.74	2251.2	2568.48	1.07053	0.863274	0.832356	0.922052	0.0748606
				Raw Western values (3 independent experiments)				Protein nomalized to t=0
Strain	Gene repressed	Hours after shift	Anti-serum	Exp 1	Exp 2	Exp 3	Average	Exp 1	Exp 2	Exp 3	Average	St error of the mean
JWY8402	uL4/L4	0	anti uS4/S9	10705.5	10341.6	9962.51	10336.6	1	1	1	1	0
		1		8646.85	8164.44	7692.15	8167.81	0.8077	0.789473	0.772109	0.789761	0.0102873
		2		5886.32	5564.07	4881.83	5444.07	0.549839	0.538027	0.49002	0.525962	0.0183132
		4		4123.35	3685.98	2584.2	3464.51	0.38516	0.356422	0.259393	0.333658	0.0380933
		8		1307.43	1886.96	1261.7	1485.36	0.122126	0.182463	0.126645	0.143745	0.019426
		0	anti uL4/L4	7404.9	7138.88	8103.71	7549.17	1	1	1	1	0
		1		6967.18	5955.88	5748.47	6223.84	0.940887	0.834288	0.709362	0.828179	0.0669844
		2		3981.15	4038.45	3808.03	3942.54	0.537638	0.565697	0.469912	0.524416	0.0284638
		4		2703.96	2394.08	2134.67	2410.9	0.365158	0.335358	0.263419	0.321312	0.0302336
		8		1051.06	1200.6	904.234	1051.96	0.141941	0.168177	0.111583	0.140567	0.0163713
		0	anti uL5/L11	nd	nd	nd
		1		nd	nd	nd
		2		nd	nd	nd
		4		nd	nd	nd
		8		nd	nd	nd
		0	anti uL18/L5	6354.76	6440.81	6609.69	6468.42	1	1	1	1	0
		1		6403.15	6798.4	6772.98	6658.18	1.00762	1.05552	1.02471	1.02928	0.0140331
		2		6025.74	5515.03	5686.91	5742.56	0.948224	0.856264	0.86039	0.888293	0.0300251
		4		5527.67	5643.96	5365.55	5512.39	0.869847	0.876281	0.81177	0.852633	0.0205399
		8		4065.72	4070.72	4574.72	4237.05	0.639791	0.63202	0.692123	0.654645	0.0188954
				Raw Western values (3 independent experiments)				Protein nomalized to t=0
Strain	Gene repressed	Hours after shift	Anti-serum	Exp 1	Exp 2	Exp 3	Average	Exp 1	Exp 2	Exp 3	Average	St error of the mean
Y1090	uL18/L5	0	anti uS4/S9	9193.49	7543.07	9036.75	8591.11	1	1	1	1	0
		1		8818.68	7367.9	6953.12	7713.24	0.959231	0.976777	0.769427	0.901812	0.0664644
		2		8117.37	7547.95	8839.02	8168.12	0.882947	1.00065	0.97812	0.953905	0.0361124
		4		7413.07	6552.66	5748.59	6571.44	0.80634	0.868699	0.636134	0.770391	0.0695825
		8		4925	3879.35	3938.3	4247.55	0.535706	0.514293	0.435809	0.495269	0.0304019
		0	anti uL4/L4	6324.98	6414.98	6118.54	6286.17	1	1	1	1	0
		1		6344.3	6221.59	5220.05	5928.65	1.00305	0.969853	0.853154	0.94202	0.0455089
		2		4789.81	4573.86	5124.26	4829.31	0.757284	0.712997	0.837497	0.769259	0.0364785
		4		5046.84	4690.55	3892.67	4543.35	0.797922	0.731186	0.636209	0.721772	0.0469748
		8		3400.43	3418.55	3016.6	3278.52	0.537618	0.532901	0.493026	0.521182	0.0141603
		0	anti uL5/L11	849.527	1177.94	1255.77	1094.41	1	1	1	1	0
		1		1020.23	888.82	889.234	932.763	1.20094	0.754554	0.708119	0.887872	0.157295
		2		907.113	950.527	805.82	887.82	1.06779	0.806939	0.641694	0.838806	0.124177
		4		680.113	798.234	717.113	731.82	0.800578	0.677652	0.571054	0.683095	0.0663924
		8		405.335	256.263	299.263	320.287	0.47713	0.217552	0.23831	0.310997	0.083381
		0	anti uL18/L5	5393.98	5749.98	5639.52	5594.49	1	1	1	1	0
		1		5130.28	4510.45	4981.76	4874.16	0.951111	0.784428	0.883366	0.872968	0.0484547
		2		4383.4	3804.03	4141.69	4109.71	0.812646	0.661573	0.734405	0.736208	0.043672
		4		2972.45	2519.23	2576.06	2689.25	0.551067	0.438129	0.456788	0.481995	0.0349952
		8		1869.65	1749.18	2005.01	1874.61	0.346617	0.304207	0.355529	0.335451	0.0158513
				Raw Western values (3 independent experiments)				Protein nomalized to t=0
Strain	Gene repressed	Hours after shift	Anti-serum	Exp 1	Exp 2	Exp 3	Average	Exp 1	Exp 2	Exp 3	Average	St error of the mean
Y1101	eL40/L40	0	anti uS4/S9	6785.18	7986.81	7086.52	7286.17	1	1	1	1	0
		1		6893.98	7142.35	7295.64	7110.66	1.01604	0.894268	1.02951	0.979938	0.0430623
		2		6753.35	6373.93	5625.23	6250.83	0.995309	0.798057	0.793793	0.862386	0.0665516
		4		4108.28	3658.45	3898.98	3888.57	0.605478	0.458061	0.550197	0.537912	0.0430477
		8		2963.33	2899.03	2786.91	2883.09	0.436735	0.362978	0.39327	0.397661	0.0214303
		0	anti uL4/L4	5131.86	5675.5	5304.67	5370.68	1	1	1	1	0
		1		5772.26	5321.03	4993.67	5362.32	1.12479	0.937545	0.941372	1.00124	0.0618595
		2		4108.01	5276.79	5300.03	4894.94	0.800492	0.929749	0.999126	0.909789	0.0582718
		4		4013.62	2550.26	3089.26	3217.71	0.782098	0.449345	0.582365	0.604603	0.0968136
		8		2973.84	3214.84	2780.01	2989.56	0.579486	0.566442	0.524069	0.556666	0.0167475
		0	anti uL5/L11	807.355	1018.48	960.941	928.924	1	1	1	1	0
		1		784.991	725.991	821.406	777.463	0.9723	0.71282	0.854793	0.846638	0.0751051
		2		753.991	649.991	536.87	646.951	0.933903	0.638199	0.558692	0.710265	0.114286
		4		405.042	417.042	378.042	400.042	0.50169	0.409476	0.393408	0.434858	0.0337764
		8		344.92	420.92	413.506	393.115	0.427222	0.413284	0.430314	0.423607	0.00524418
		0	anti uL18/L5	3544.55	3311.5	3034.38	3296.81	1	1	1	1	0
		1		3655.91	3233.38	3675.91	3521.73	1.03142	0.976409	1.21142	1.07308	0.0710532
		2		3457.03	3185.5	2925.03	3189.19	0.97531	0.961951	0.963965	0.967075	0.00416312
		4		2331.2	1979.38	2121.79	2144.12	0.657688	0.597728	0.699251	0.651556	0.0295019
		8		1825.96	1509.01	1801.01	1712	0.515147	0.455689	0.593536	0.521457	0.0399653
Source data for Fig 3J: Quantification of 18S/25S rRNA ratios
									Raw 18S/25S ratio			Average raw ratio	Standard error	Ratio normalized to t=0			Average normalized ratio	Standard error
Strain	Gene repressed	Time	Exp 1		Exp 2		Exp 3
			25S	18S	25S	18S	25S	18S	Exp 1	Exp2	Exp3			Exp 1	Exp2	Exp3
BY4741	None	0	22183.2	10530.4	21579	11032.6	22461.4	11234.1	0.4747	0.511264	0.50015	0.495371	0.0108352	1	1	1	1	0
		1	22386.5	11553.3	20237	10131.8	18880.6	9398.14	0.516083	0.500655	0.497766	0.504835	0.00569261	1.08718	0.979248	0.995233	1.02055	0.0336706
		2	22160.7	10785.3	20253.3	9273.77	22020.6	9559.84	0.486684	0.45789	0.434132	0.459569	0.0152117	1.02525	0.895604	0.868003	0.929617	0.048531
		4	22092.2	9589.55	17524.1	8362.77	15519.7	7964.46	0.434069	0.477215	0.513182	0.474822	0.0228966	0.914407	0.933401	1.02606	0.957955	0.0345305
		8	28331.2	11395	27564.8	12084.1	24045.5	10390.8	0.402205	0.438389	0.432129	0.424241	0.0111783	0.847284	0.85746	0.863999	0.856248	0.00486907
JW8402	uL4/L4	0	3781.59	4389.47	5034.4	6713.18	5935.74	7985.76	1.16075	1.33346	1.34537	1.27986	0.0597259	1	1	1	1	0
		1	5770.71	8887.17	5018.98	8447.76	4124.4	7313.71	1.54005	1.68316	1.77328	1.6655	0.0679855	1.32677	1.26225	1.31806	1.30236	0.020237
		2	2032.4	6382.3	1430.96	4819.88	1447.43	4898.37	3.14028	3.36828	3.38419	3.29758	0.0788796	2.7054	2.52597	2.51544	2.58227	0.0617124
		4	2256.45	5180.03	2153.15	4984.88	1846.84	5656.23	2.29566	2.31515	3.06265	2.55782	0.252776	1.97774	1.7362	2.27644	1.99679	0.156429
		8	4306.91	9032.39	4693.45	10612.9	3859.45	7526.27	2.09718	2.26121	1.95009	2.10283	0.0899639	1.80675	1.69575	1.44948	1.65066	0.105695
Y1090	uL18/L5	0	23389	11198	26824.9	12971.9	21961.8	11468.7	0.47877	0.483577	0.522212	0.494853	0.013766	1	1	1	1	0
		1	25759.3	12846.8	25312.7	13908.6	28094.5	15183.4	0.498725	0.54947	0.540441	0.529545	0.0156475	1.04168	1.13626	1.03491	1.07095	0.032753
		2	25156.9	14446.4	22506.8	14643.9	22106.5	14674.6	0.574251	0.650644	0.663812	0.629569	0.0279524	1.19943	1.34548	1.27116	1.27202	0.042214
		4	9836.19	7791.56	10305.8	6628.9	17495.7	12221.3	0.792132	0.643221	0.698531	0.711295	0.0435096	1.65452	1.33013	1.33764	1.44076	0.107026
		8	14996.8	11001.2	12177.3	8530.42	14976.9	8757.37	0.733567	0.700517	0.584723	0.672936	0.04518	1.53219	1.44862	1.11971	1.36684	0.126049
Y1101	eL40/L40	0	7625.82	6727.53	7361.58	6854.7	7715.41	6993.41	0.882204	0.931145	0.906421	0.90659	0.0141452	1	1	1	1	0
		1	3993.46	4297.16	3920.58	4161.46	3882.75	4119.04	1.07605	1.06144	1.06086	1.06612	0.00497632	1.21973	1.13993	1.17038	1.17668	0.0232787
		2	2157.75	2782.75	2036.92	2419.34	2180.63	2572.46	1.28965	1.18774	1.17969	1.21903	0.0354316	1.46185	1.27557	1.30148	1.3463	0.0583279
		4	2239.04	2245.92	1910.04	1965.75	1447.04	1476.16	1.00307	1.02917	1.02012	1.01745	0.00765905	1.13701	1.10527	1.12544	1.12257	0.00928487
		8	1323.63	1158.46	1100.63	1099.16	1416.34	1320.63	0.875213	0.99867	0.932426	0.935436	0.0357129	0.992076	1.07252	1.02869	1.03109	0.0232801

## Sheet: Page 2
uS4/uL4					uL5/uL4					uL18/uL4					uS4/uL4					uL5/uL4					uL18/uL4
Exp 1	Exp 2	Exp 3	Avg	Std-error	Exp 1	Exp 2	Exp 3	Avg	Std-error	Exp 1	Exp 2	Exp 3	Avg	Std-error	Exp 1	Exp 2	Exp 3	Avg	Std-error	Exp 1	Exp 2	Exp 3	Avg	Std-error	Exp 1	Exp 2	Exp 3	Avg	Std-error
1.25159	1.15214	1.02942	1.14438	0.0643296	0.200072	0.167859	0.184846	0.184259	0.00931469	0.461593	0.457683	0.460695	0.45999	0.0011837	1	1	1	1	0	1	1	1	1	0	1	1	1	1	0
1.20996	1.13478	1.1408	1.16185	0.0241479	0.216402	0.218368	0.224568	0.219779	0.00246357	0.556991	0.505556	0.490882	0.51781	0.0200671	0.966739	0.984936	1.1082	1.01996	0.0288015	1.08162	1.3009	1.21489	1.19914	0.0747871	1.20667	1.1046	1.06553	1.1256	0.0478087
1.01878	0.968056	0.994966	0.993933	0.0146689	0.206917	0.196723	0.218205	0.207282	0.00621143	0.478102	0.420991	0.473628	0.457574	0.0183587	0.813986	0.840225	0.966534	0.873582	0.0618002	1.03421	1.17195	1.18047	1.12888	0.0549526	1.03577	0.91983	1.02807	0.994557	0.054642
1.01895	1.14477	1.16853	1.11075	0.0464656	0.225615	0.227913	0.235452	0.22966	0.00297439	0.561827	0.608701	0.505354	0.558627	0.0299118	0.81412	0.993605	1.13514	0.980954	0.0741003	1.12767	1.35776	1.27377	1.25307	0.0651804	1.21715	1.32996	1.09694	1.21468	0.08495
1.01738	1.10788	1.03598	1.05375	0.0276248	0.208348	0.208437	0.210101	0.208962	0.000570953	0.422229	0.421118	0.422281	0.421876	0.000379823	0.812872	0.961582	1.00637	0.926942	0.0714901	1.04137	1.24174	1.13663	1.13991	0.0665388	0.914722	0.920108	0.916619	0.917149	0.103268
uS4/uL4										uL18/uL4					uS4/uL4										uL18/uL4
Exp 1	Exp 2	Exp 3	Avg	Std-error						Exp 1	Exp 2	Exp 3	Avg	Std-error	Exp 1	Exp 2	Exp 3	Avg	Std-error						Exp 1	Exp 2	Exp 3	Avg	Std-error
1.44574	1.44863	1.22938	1.37458	0.0726938						0.858183	0.902216	0.815637	0.858679	0.0250238	1	1	1	1	0						1	1	1	1	0
1.24108	1.37082	1.33812	1.31668	0.0390023						0.919046	1.14146	1.17822	1.07958	0.0810598	0.858445	0.946284	1.08846	0.964395	0.0438527						1.07092	1.26517	1.44454	1.26021	0.106896
1.47855	1.37778	1.28198	1.37943	0.0568161						1.51357	1.36563	1.4934	1.45753	0.0463724	1.02269	0.951086	1.04279	1.00552	0.0476997						1.76369	1.51364	1.83096	1.70276	0.167237
1.52493	1.53962	1.21059	1.42505	0.10744						2.04429	2.35746	2.51353	2.30509	0.13813	1.05478	1.06281	0.984717	1.0341	0.0252488						2.38211	2.61297	3.08167	2.69225	0.344351
1.24391	1.57169	1.39532	1.40364	0.0948243						3.8682	3.39058	5.05922	4.106	0.496741	0.860399	1.08494	1.13498	1.02678	0.0557043						4.50743	3.75806	6.20278	4.82276	0.824629
uS4/uL4					uL5/uL4					uL18/uL4					uS4/uL4					uL5/uL4					uL18/uL4
Exp 1	Exp 2	Exp 3	Avg	Std-error	Exp 1	Exp 2	Exp 3	Avg	Std-error	Exp 1	Exp 2	Exp 3	Avg	Std-error	Exp 1	Exp 2	Exp 3	Avg	Std-error	Exp 1	Exp 2	Exp 3	Avg	Std-error	Exp 1	Exp 2	Exp 3	Avg	Std-error
1.45352	1.17585	1.47695	1.36877	0.0968115	0.134313	0.183623	0.20524	0.174392	0.0210136	0.852806	0.896336	0.92171	0.890284	0.0201436	1	1	1	1	0	1	1	1	1	0	1	1	1	1	0
1.39002	1.18425	1.332	1.30209	0.0613272	0.160811	0.142861	0.17035	0.158007	0.00806784	0.808644	0.724967	0.95435	0.82932	0.0670989	0.956311	1.00714	0.901863	0.955104	0.0238987	1.19729	0.778009	0.830001	0.935099	0.0859395	0.948216	0.808811	1.03541	0.930813	0.047123
1.69472	1.65024	1.72494	1.68996	0.0217208	0.189384	0.207817	0.157256	0.184819	0.0147906	0.91515	0.83169	0.808252	0.851697	0.0324783	1.16594	1.40344	1.16791	1.24576	0.106321	1.41002	1.13176	0.766205	1.10266	0.153861	1.0731	0.927877	0.876905	0.959296	0.0566117
1.46885	1.39699	1.47677	1.44754	0.025407	0.13476	0.170179	0.184221	0.163054	0.0147335	0.588972	0.537087	0.661773	0.595944	0.0362048	1.01055	1.18807	0.999883	1.06617	0.0848618	1.00333	0.926784	0.897589	0.942568	0.129853	0.690628	0.599203	0.717984	0.669272	0.101534
1.44835	1.13479	1.30554	1.29623	0.0907428	0.119201	0.0749625	0.0992055	0.0977897	0.0128054	0.549828	0.511675	0.66466	0.575387	0.0460295	0.996443	0.965082	0.883947	0.94849	0.0576534	0.887489	0.408241	0.483363	0.593031	0.14654	0.644728	0.570851	0.721116	0.645565	0.0363982
uS4/uL4					uL5/uL4					uL18/uL4					uS4/uL4					uL5/uL4					uL18/uL4
Exp 1	Exp 2	Exp 3	Avg	Std-error	Exp 1	Exp 2	Exp 3	Avg	Std-error	Exp 1	Exp 2	Exp 3	Avg	Std-error	Exp 1	Exp 2	Exp 3	Avg	Std-error	Exp 1	Exp 2	Exp 3	Avg	Std-error	Exp 1	Exp 2	Exp 3	Avg	Std-error
1.32217	1.40724	1.3359	1.3551	0.0264011	0.157322	0.179452	0.18115	0.172641	0.00768436	0.690694	0.583473	0.57202	0.615396	0.0378391	1	1	1	1	0	1	1	1	1	0	1	1	1	1	0
1.19433	1.34229	1.46098	1.33253	0.0772201	0.135994	0.136438	0.164489	0.14564	0.00943657	0.633359	0.607659	0.736114	0.659044	0.0392892	0.903314	0.95384	1.09363	0.983593	0.0363696	0.864429	0.760305	0.908029	0.844254	0.0565135	0.916989	1.04145	1.28687	1.08177	0.0734272
1.64395	1.20792	1.06136	1.30441	0.175169	0.183542	0.123179	0.101296	0.136005	0.0246224	0.841534	0.603681	0.55189	0.665702	0.0892843	1.24337	0.858357	0.794487	0.965406	0.095872	1.16666	0.68642	0.559181	0.804087	0.120893	1.21839	1.03463	0.964808	1.07261	0.0837792
1.02358	1.43454	1.26211	1.24008	0.119285	0.100917	0.16353	0.122373	0.12894	0.0183923	0.580824	0.776148	0.686829	0.681267	0.0565208	0.774172	1.0194	0.944763	0.912778	0.101224	0.641467	0.911274	0.675535	0.742759	0.130155	0.840927	1.33022	1.20071	1.12395	0.105455
0.996464	0.901766	1.00248	0.966904	0.0326541	0.115985	0.13093	0.148743	0.131886	0.00947966	0.614008	0.469389	0.647843	0.57708	0.054789	0.75366	0.640802	0.750416	0.714959	0.0810575	0.737244	0.729613	0.821101	0.762653	0.0571101	0.888972	0.804475	1.13255	0.942	0.125496
uS4/uL4										uL18/uL4					uS4/uL4										uL18/uL4
Exp 1	Exp 2	Exp 3	Avg	Std-error						Exp 1	Exp 2	Exp 3	Avg	Std-error	Exp 1	Exp 2	Exp 3	Avg	Std-error						Exp 1	Exp 2	Exp 3	Avg	Std-error
2.40377	2.79983	2.88172	2.69511	0.147749						1.01719	1.26913	1.17111	1.15248	0.0734099	1	1	1	1	0						1	1	1	1	0
2.34693	2.24265	2.0047	2.19809	0.101395						1.34329	1.15221	1.15521	1.2169	0.0632721	0.976353	0.800995	0.695659	0.824336	0.024						1.32058	0.907877	0.986423	1.07163	0.024
1.23229	1.41828	1.07527	1.24195	0.0992554						1.13673	1.30953	1.08316	1.17647	0.0683847	0.512649	0.506561	0.373134	0.464115	0.106						1.11752	1.03183	0.924894	1.02475	0.106
0.625979	0.775891	0.552115	0.651328	0.0659084						1.29952	1.34444	1.21287	1.28561	0.0386579	0.260415	0.277121	0.191592	0.243043	0.085						1.27756	1.05934	1.03566	1.12419	0.085
0.304139	0.64192	0.407035	0.451031	0.100078						1.19998	1.97504	1.25765	1.47756	0.249592	0.126526	0.229271	0.141247	0.165681	0.058						1.1797	1.55621	1.07389	1.26994	0.058
uS4/uL4					uL5/uL4					uL18/uL4					uS4/uL4					uL5/uL4					uL18/uL4
Exp 1	Exp 2	Exp 3	Avg	Std-error	Exp 1	Exp 2	Exp 3	Avg	Std-error	Exp 1	Exp 2	Exp 3	Avg	Std-error	Exp 1	Exp 2	Exp 3	Avg	Std-error	Exp 1	Exp 2	Exp 3	Avg	Std-error	Exp 1	Exp 2	Exp 3	Avg	Std-error
1.32224	1.19201	1.49689	1.33705	0.0884277	0.10393	0.0858712	0.0952455	0.0950155	0.00522054	0.682744	0.778223	0.890986	0.783984	0.0602544	1	1	1	1	0	1	1	1	1	0	1	1	1	1	0
1.06228	0.78577	0.571955	0.806669	0.142099	0.100387	0.0980643	0.0873142	0.0952551	0.00403145	0.719924	0.832155	0.849239	0.80044	0.0406066	0.803396	0.659199	0.382095	0.614897	0.144718	0.96591	1.14199	0.916727	1.00821	0.0433263	1.05446	1.0693	0.953146	1.02563	0.0244648
0.8727	0.770786	0.933531	0.859006	0.047533	0.112874	0.11737	0.125589	0.118611	0.00372728	0.845782	0.879897	1.05797	0.927884	0.0658636	0.660016	0.646628	0.623647	0.64343	0.0789891	1.08606	1.36681	1.31859	1.25715	0.105226	1.2388	1.13065	1.18742	1.18562	0.0590133
0.623649	0.535956	0.445094	0.5349	0.0516082	0.137021	0.113895	0.105704	0.118873	0.00938805	1.07774	1.0686	1.28732	1.14456	0.071517	0.471661	0.449625	0.297345	0.40621	0.0829084	1.3184	1.32635	1.1098	1.25152	0.0708411	1.57855	1.37313	1.44483	1.4655	0.0983504
0.327594	0.258975	0.289244	0.291938	0.0198777	0.146824	0.100802	0.108163	0.118596	0.0142896	1.47477	1.25502	1.24463	1.32481	0.0751323	0.247757	0.21726	0.19323	0.219415	0.0692109	1.41272	1.17388	1.13562	1.24074	0.0709116	2.16007	1.61267	1.39691	1.72322	0.169489
uS4/uL4					uL5/uL4					uL18/uL4					uS4/uL4					uL5/uL4					uL18/uL4
Exp 1	Exp 2	Exp 3	Avg	Std-error	Exp 1	Exp 2	Exp 3	Avg	Std-error	Exp 1	Exp 2	Exp 3	Avg	Std-error	Exp 1	Exp 2	Exp 3	Avg	Std-error	Exp 1	Exp 2	Exp 3	Avg	Std-error	Exp 1	Exp 2	Exp 3	Avg	Std-error
1.45217	1.51544	1.28674	1.41812	0.0682626	0.177164	0.138336	0.152947	0.156149	0.0113357	0.343463	0.385315	0.431001	0.386593	0.0253081	1	1	1	1	0	1	1	1	1	0	1	1	1	1	0
0.977092	1.04101	1.33182	1.11664	0.10929	0.161854	0.159473	0.164521	0.16195	0.00145975	0.465159	0.44237	0.441802	0.449777	0.00770196	0.672852	0.686933	1.03504	0.798273	0.0983951	0.913587	1.1528	1.07568	1.04735	0.0470305	1.35432	1.14808	1.02506	1.17582	0.0823528
1.04979	0.934857	1.04037	1.00834	0.0368853	0.171935	0.169736	0.156144	0.165939	0.00494398	0.404153	0.389073	0.368712	0.387313	0.0102809	0.722917	0.616886	0.80853	0.716111	0.0866959	0.970489	1.22699	1.02091	1.07279	0.0671906	1.1767	1.00975	0.855478	1.01398	0.0987484
0.733227	0.726661	0.703388	0.721092	0.00906343	0.179909	0.151265	0.148322	0.159832	0.0100864	0.377595	0.400676	0.440072	0.406114	0.018261	0.50492	0.479504	0.546645	0.510356	0.0749372	1.0155	1.09346	0.969763	1.02624	0.0565733	1.09938	1.03987	1.02105	1.05343	0.0618045
0.628195	0.649055	0.726864	0.668038	0.0300586	0.162414	0.178845	0.212848	0.184703	0.0148683	0.494342	0.435816	0.466357	0.465505	0.0169202	0.432592	0.428294	0.564889	0.475258	0.0328693	0.916747	1.29283	1.39165	1.20041	0.109211	1.43929	1.13107	1.08203	1.21746	0.0889626
