# Supplementary material for: The small and large ribosomal subunits depend on each other for stability and accumulation
Source: Life Sci Alliance. 2019 Mar 5;2(2):e201800150. doi: 10.26508/lsa.201800150 (PMC6402506; doi:10.26508/lsa.201800150)
Supplement: Supplementary file 3 [file LSA-2018-00150_SdataF5.xlsx]

## Sheet: Sheet1
Source data for Figure 5A-C: Quantification of Western blots
				Raw Western values (3 independent experiments)				Protein nomalized to t=0
Strain	Gene repressed	Hours after shift	Anti-serum	Exp 1	Exp 2	Exp 3	Average	Exp 1	Exp 2	Exp 3	Average	St error of the mean
Y259	uS4/S9	0	anti uS4/S9	11055.6	12801.7	12264.4	12040.6	1	1	1	1	0
		1		9876.92	9120	10185.2	9727.39	0.893386	0.712404	0.830475	0.812088	0.0531107
		2		7527.97	6614.85	5586.37	6576.4	0.680919	0.516716	0.455496	0.551044	0.0673794
		4		3167.4	3935.35	3483.93	3528.89	0.286497	0.307408	0.28407	0.292658	0.00741674
		8		1890.79	2299.03	2208.2	2132.68	0.171026	0.179588	0.180051	0.176888	0.00293774
		0	anti uL4/L4	4599.28	4572.33	4255.91	4475.84	1	1	1	1	0
		1		4208.45	4066.62	5080.69	4451.92	0.915024	0.889398	1.1938	0.999406	0.0975916
		2		6108.93	4663.98	5195.33	5322.75	1.32824	1.02005	1.22073	1.18967	0.0904197
		4		5059.91	5072.03	6310.15	5480.7	1.10015	1.10929	1.48268	1.23071	0.126163
		8		6216.86	3581.5	5425.1	5074.49	1.3517	0.783299	1.27472	1.13657	0.178242
		0	anti uL5/L11	nd	nd	nd
		1		nd	nd	nd
		2		nd	nd	nd
		4		nd	nd	nd
		8		nd	nd	nd
		0	anti uL18/L5	4678.35	5802.88	4984.15	5155.13	1	1	1	1	0
		1		5653.15	4685.62	5869.28	5402.68	1.20837	0.807464	1.17759	1.06447	0.128964
		2		6944.23	6107.64	5627.35	6226.4	1.48433	1.05252	1.12905	1.22197	0.133188
		4		6575.47	6819.05	7653.42	7015.98	1.40551	1.17512	1.53555	1.37206	0.105509
		8		7460.12	7073.59	6822.88	7118.87	1.59461	1.21898	1.36891	1.39417	0.109297
				Raw Western values (3 independent experiments)				Protein nomalized to t=0
Strain	Gene repressed	Hours after shift	Anti-serum	Exp 1	Exp 2	Exp 3	Average	Exp 1	Exp 2	Exp 3	Average	St error of the mean
Y399	uS11/S14	0	anti uS4/S9	8172.32	7208.37	9623.85	8334.85	1	1	1	1	0
		1		6442.47	4978.4	3509.91	4976.93	0.788328	0.690641	0.36471	0.61456	0.12822
		2		5206.15	4226.15	5107.45	4846.59	0.637047	0.586284	0.530707	0.58468	0.0307447
		4		3222.96	2901.43	2184.84	2769.74	0.394376	0.402508	0.227024	0.341302	0.0572554
		8		1422.18	1281.36	1473.89	1392.48	0.174025	0.177759	0.15315	0.168311	0.00766609
		0	anti uL4/L4	6180.66	6047.25	6429.23	6219.04	1	1	1	1	0
		1		6064.74	6335.69	6136.69	6179.04	0.981245	1.0477	0.954499	0.994481	0.0277392
		2		5965.57	5482.91	5471.1	5639.86	0.965199	0.906679	0.850974	0.907618	0.0330164
		4		5167.91	5413.55	4908.72	5163.39	0.836142	0.895209	0.763501	0.831617	0.0381332
		8		4341.31	4947.79	5095.67	4794.92	0.702402	0.818189	0.792579	0.771057	0.0351562
		0	anti uL5/L11	642.355	519.284	612.355	591.331	1	1	1	1	0
		1		608.82	621.305	535.82	588.648	0.947794	1.19646	0.875015	1.00642	0.0974304
		2		673.355	643.527	687.113	667.998	1.04826	1.23926	1.12208	1.13653	0.0556738
		4		708.113	616.577	518.87	614.52	1.10237	1.18736	0.847335	1.04569	0.102287
		8		637.406	498.749	551.163	562.439	0.992296	0.960455	0.900071	0.950941	0.0270767
		0	anti uL18/L5	4219.81	4706.1	5728.35	4884.75	1	1	1	1	0
		1		4366.15	5272.28	5211.52	4949.98	1.03468	1.12031	0.909777	1.02159	0.0611985
		2		5045.57	4824.4	5788.28	5219.41	1.19569	1.02514	1.01046	1.07709	0.0595173
		4		5569.69	5784.91	6319.1	5891.24	1.31989	1.22924	1.10313	1.21742	0.0629267
		8		6402.45	6209.57	6342.23	6318.08	1.51724	1.31947	1.10716	1.31462	0.118542
				Raw Western values (3 independent experiments)				Protein nomalized to t=0
Strain	Gene repressed	Hours after shift	Anti-serum	Exp 1	Exp 2	Exp 3	Average	Exp 1	Exp 2	Exp 3	Average	St error of the mean
Y1198	uS10/S20	0	anti uS4/S9	8638.48	9965.02	8762.94	9122.15	1	1	1	1	0
		1		6985.02	7507.36	9363.19	7951.86	0.808594	0.753371	1.0685	0.876821	0.0972703
		2		7470.55	6051.97	6373.99	6632.17	0.864799	0.607322	0.72738	0.733167	0.0744717
		4		4854.22	4529.78	4285.61	4556.54	0.56193	0.454568	0.48906	0.501853	0.0316831
		8		4203.47	4318.47	3905.9	4142.61	0.486598	0.433363	0.445729	0.45523	0.0161042
		0	anti uL4/L4	5948.69	6575.64	6810.2	6444.85	1	1	1	1	0
		1		7148.79	7211.62	7030.38	7130.26	1.20174	1.09672	1.03233	1.11026	0.0494304
		2		7116.2	6473.69	6126.69	6572.19	1.19626	0.984496	0.899634	1.0268	0.088308
		4		6620.35	6233.69	6092.81	6315.62	1.11291	0.947997	0.894659	0.985188	0.065768
		8		6691.35	6653.47	5373.64	6239.48	1.12484	1.01184	0.789057	0.975246	0.0987616
		0	anti uL5/L11	1053.89	909.648	1041.6	1001.71	1	1	1	1	0
		1		1157.06	1150.06	1156.65	1154.59	1.0979	1.26429	1.11046	1.15755	0.0535591
		2		1223.53	1098.82	956.648	1093	1.16096	1.20796	0.918443	1.09579	0.0898114
		4		1191.06	942.941	903.698	1012.57	1.13016	1.0366	0.867607	1.01145	0.0769183
		8		1086.77	1189.94	1143.77	1140.16	1.0312	1.30813	1.09809	1.14581	0.0835274
		0	anti uL18/L5	2043.15	2533.69	2935.2	2504.02	1	1	1	1	0
		1		3325.33	3190.2	3106.03	3207.19	1.62755	1.25911	1.0582	1.31495	0.166908
		2		2876.03	2518.74	2258.98	2551.25	1.40764	0.9941	0.769617	1.05712	0.18708
		4		2499.81	2497.69	2681.28	2559.59	1.22351	0.985791	0.913488	1.04093	0.0937553
		8		3307.81	2899.69	2506.03	2904.51	1.61897	1.14445	0.853785	1.20574	0.22327
SourcSource data for Fig 5H: Quantification of 18S/25S rRNA ratios
									Raw 18S/25S ratio			Average raw ratio	Standard error	Ratio normalized to t=0			Average normalized ratio	Standard error
Strain	Gene repressed	Time	Exp 1		Exp 2		Exp 3
			25S	18S	25S	18S	25S	18S	Exp 1	Exp2	Exp3			Exp 1	Exp2	Exp3
BY4741	None	0	22183.2	10530.4	21579	11032.6	22461.4	11234.1	0.4747	0.511264	0.50015	0.495371	0.0108352	1	1	1	1	0
		1	22386.5	11553.3	20237	10131.8	18880.6	9398.14	0.516083	0.500655	0.497766	0.504835	0.00569261	1.08718	0.979248	0.995233	1.02055	0.0336706
		2	22160.7	10785.3	20253.3	9273.77	22020.6	9559.84	0.486684	0.45789	0.434132	0.459569	0.0152117	1.02525	0.895604	0.868003	0.929617	0.048531
		4	22092.2	9589.55	17524.1	8362.77	15519.7	7964.46	0.434069	0.477215	0.513182	0.474822	0.0228966	0.914407	0.933401	1.02606	0.957955	0.0345305
		8	28331.2	11395	27564.8	12084.1	24045.5	10390.8	0.402205	0.438389	0.432129	0.424241	0.0111783	0.847284	0.85746	0.863999	0.856248	0.00486907
Y259	uS4/S9	0	1955.72	1533.48	2664.26	2100.13	2830.43	2351.96	0.784099	0.788263	0.830957	0.801106	0.0149914	1	1	1	1	0
		1	3733.08	2435.08	3816.84	2690.96	3779.38	2424.18	0.652298	0.705023	0.641424	0.666249	0.0196631	0.831908	0.894401	0.771911	0.83274	0.0354043
		2	3813.38	1880.48	4046.79	1792.94	4303.08	1756.82	0.493127	0.443053	0.40827	0.44815	0.0246574	0.628909	0.562062	0.491325	0.560765	0.0397693
		4	3087.08	1085.23	2059.96	421.163	3638.26	602.284	0.35154	0.204452	0.165542	0.240511	0.0567065	0.448337	0.25937	0.199219	0.302308	0.0751395
		8	6195.67	1073.53	7103.38	1140.53	3989.5	505.87	0.173271	0.160561	0.1268	0.153544	0.0138824	0.220981	0.20369	0.152596	0.192422	0.0205535
Y399	uS11/S14	0	12677.2	5824.8	11900.9	5643.68	13095	7538.92	0.459472	0.474222	0.57571	0.503135	0.03658	1	1	1	1	0
		1	12905.9	6909.44	13380.2	7164.97	14315.2	7983.44	0.53537	0.535492	0.55769	0.542851	0.00742865	1.16518	1.1292	0.968699	1.08769	0.0604694
		2	14950.9	7901.61	14617.1	7953.2	12148.7	5899.3	0.528502	0.544102	0.485593	0.519399	0.0175134	1.15024	1.14736	0.843467	1.04702	0.101901
		4	7466.27	3309.93	3911.59	851.891	5960.1	1062.6	0.443318	0.217786	0.178285	0.279797	0.08265	0.964843	0.45925	0.309679	0.577924	0.198454
		8	14392	1914.03	16389	1973.79	14748.9	1843.08	0.132993	0.120434	0.124964	0.12613	0.00367633	0.289447	0.253961	0.21706	0.253489	0.0209224
Y1198	uS10/S20	0	13211.7	6008.66	15941.9	8672.02	18506.5	9103.56	0.454799	0.543976	0.491912	0.496896	0.0258942	1	1	1	1	0
		1	15197.7	7334.32	17852.9	8009.27	19349	8904	0.482595	0.448625	0.460178	0.463799	0.00998377	1.06112	0.824715	0.935487	0.940439	0.068369
		2	19349.9	7705.97	24073.1	7017.85	16665.3	4977.27	0.398244	0.291523	0.298661	0.329476	0.0344867	0.875648	0.53591	0.607143	0.672901	0.103561
		4	13801.5	3272.3	18311.4	4348.61	20644.2	3864.37	0.237097	0.237481	0.187189	0.220589	0.0167202	0.521322	0.436565	0.380533	0.44614	0.0409717
		8	25973.2	2231.18	25214.9	2124.33	18491.9	1659.43	0.0859028	0.0842489	0.0897382	0.08663	0.00162772	0.188881	0.154876	0.182427	0.175395	0.0104394
