# Supplementary material for: The small and large ribosomal subunits depend on each other for stability and accumulation
Source: Life Sci Alliance. 2019 Mar 5;2(2):e201800150. doi: 10.26508/lsa.201800150 (PMC6402506; doi:10.26508/lsa.201800150)
Supplement: Supplementary file 4 [file LSA-2018-00150_SdataF6.xlsx]

## Sheet: Brian's data
												1660
1660													BY4741
	BY4741	S9	L4					BY4741	S9	L4			norm			Mean	stdev	error
0	8051.71	8012.18	11596.6				0	9420.25	12416.4	12837		0	1	1	1	1	0	0
	8831.25	19521.8	12020.1				1	21207.9	26813.4	32031.1		1	2.52273	2.63695	1.75991	2.30653	0.476822	0.27562
	11377.8	9715.27	14894.4				2	23635.6	25745.4	28301		2	2.89799	2.59555	2.1666	2.55338	0.367513	0.212435
1	20312.3	18501.4	30236.7				4	29618.8	23242.8	27996.8		4	3.61947	3.49612	2.53463	3.21674	0.593934	0.343314
	23287.5	32659.2	32918				8	25807.5	19871.7	26623.1		8	3.06267	2.91167	2.37736	2.7839	0.360079	0.208138
	20023.9	29279.5	32938.7
2	23333.8	21642.1	27398.5										S9
	22921.9	27358.6	27906.4					BY4741	S9	L4			norm			Mean	stdev	error
	24651.1	28235.4	29598.2				0	1	1	1		0	1	1	1	1	0	0
4	29142.9	16526	29150.8				1	2.25131	2.15951	2.49522		1	2.30916	1.67296	3.01377	2.33196	0.670694	0.387684
	30875.1	25456.2	27955.2				2	2.50902	2.0735	2.20464		2	2.70115	1.40144	2.9063	2.33629	0.816081	0.471723
	28838.5	27746.1	26884.5				4	3.14417	1.87194	2.18095		4	2.06261	1.30399	2.85593	2.07418	0.776036	0.448575
8	24659.7	21370.8	26318.4				8	2.73958	1.60044	2.07393		8	2.06261	1.04222	1.8423	1.64904	0.536947	0.310374
	25713.6	20345.9	26787.4
	27049.1	17898.5	26763.4										L4
													norm			Mean	stdev	error
												0	1	1	1	1	0	0
												1	2.60738	2.73858	2.21149	2.51915	0.274398	0.158611
												2	2.36264	2.32165	1.98721	2.22383	0.205944	0.119043
												4	2.51374	2.3257	1.80501	2.21482	0.367145	0.212223
												8	2.2695	2.22855	1.79688	2.09831	0.261847	0.151357
												1680
1680													BY4741
	BY4741	S9	L4					BY4741	S9	L4			norm			Mean	stdev	error
0	8250.78	5580.81	10093.9				0	8710.55	9963.11	10104.4		0	1	1	1	1	0	0
	7884.61	15822	10079.1				1	19685.5	28365	30490.6		1	2.51138	2.44813	1.90403	2.28785	0.333897	0.193004
	9996.27	8486.54	10140.2				2	24654.4	23139.6	27699.1		2	2.68426	3.23659	2.63064	2.8505	0.335439	0.193895
1	20720.8	15243.8	27246.4				4	38401.5	21973.2	31358.2		4	4.67188		3.82707	4.24947	0.59737	0.423667
	19302.6	32934.2	31335				8	30200.9	23779.9	26949.3		8	3.55495	3.71185	3.20172	3.48951	0.261288	0.151034
	19033.2	36916.8	32890.5
2	22147.2	20892.1	27620.3										S9
	25519.2	27508.7	27128.2					BY4741	S9	L4			norm			Mean	stdev	error
	26296.6	21017.8	28349				0	1	1	1		0	1	1	1	1	0	0
4	38546.7	15366.7	29561.7				1	2.25996	2.847	3.01756		1	2.73147	2.08155	4.35005	3.05435	1.16821	0.675265
		21413.5	32173.8				2	2.8304	2.32252	2.7413		2	3.74356	1.73864	2.47661	2.65294	1.01402	0.586141
	38256.4	29139.5	32339.1				4	4.40862	2.20546	3.10342		4	2.75349	1.3534	3.43362	2.5135	1.06067	0.613104
8	29331.1	24201.1	27886.8				8	3.46717	2.3868	2.66709		8	4.33648	1.50147	2.75524	2.8644	1.42065	0.821186
	29266.5	23756.2	27719.3
	32005.2	23382.5	25241.9										L4
													norm			Mean	stdev	error
												0	1	1	1	1	0	0
												1	2.69931	3.10889	3.24358	3.01726	0.28347	0.163855
												2	2.73635	2.69152	2.7957	2.74119	0.0522611	0.0302087
												4	2.92868	3.19211	3.1892	3.10333	0.151261	0.0874339
												8	2.76275	2.75016	2.48929	2.6674	0.154375	0.0892343

## Sheet: Raw data for LSA
Source data for Figure 6. Quantification of ITS1 and ITS2 hybridization to slot blots
Probe: O1660
		Protein gene repressed
	Exp	BY4741	uS4	uL4
0	1	8051.71	8012.18	11596.6
	2	8831.25	19521.8	12020.1
	3	11377.8	9715.27	14894.4
1	1	20312.3	18501.4	30236.7
	2	23287.5	32659.2	32918
	3	20023.9	29279.5	32938.7
2	1	23333.8	21642.1	27398.5
	2	22921.9	27358.6	27906.4
	3	24651.1	28235.4	29598.2
4	1	29142.9	16526	29150.8
	2	30875.1	25456.2	27955.2
	3	28838.5	27746.1	26884.5
8	1	24659.7	21370.8	26318.4
	2	25713.6	20345.9	26787.4
	3	27049.1	17898.5	26763.4
Probe: O1680
		Protein gene repressed
	Exp	BY4741	S9	L4
0	1	8250.78	5580.81	10093.9
	2	7884.61	15822	10079.1
	3	9996.27	8486.54	10140.2
1	1	20720.8	15243.8	27246.4
	2	19302.6	32934.2	31335
	3	19033.2	36916.8	32890.5
2	1	22147.2	20892.1	27620.3
	2	25519.2	27508.7	27128.2
	3	26296.6	21017.8	28349
4	1	38546.7	15366.7	29561.7
	2		21413.5	32173.8
	3	38256.4	29139.5	32339.1
8	1	29331.1	24201.1	27886.8
	2	29266.5	23756.2	27719.3
	3	32005.2	23382.5	25241.9
